# Supplementary material
Source: Springer Nature journal article supplement (https://www.springermedizin.de/resource/supplementary/12879_2013_2974_MOESM3_ESM.pdf/9446240)

### VPI 10463

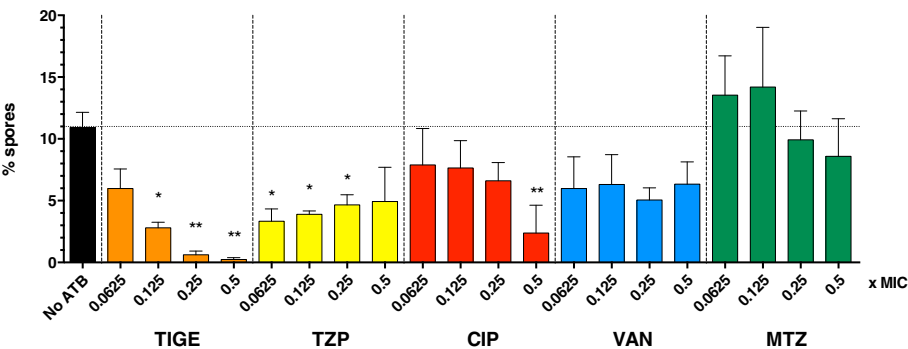

### CD386

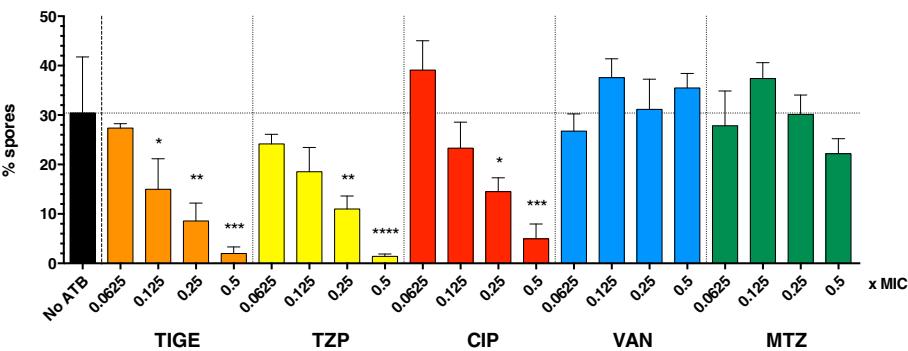

### CD392

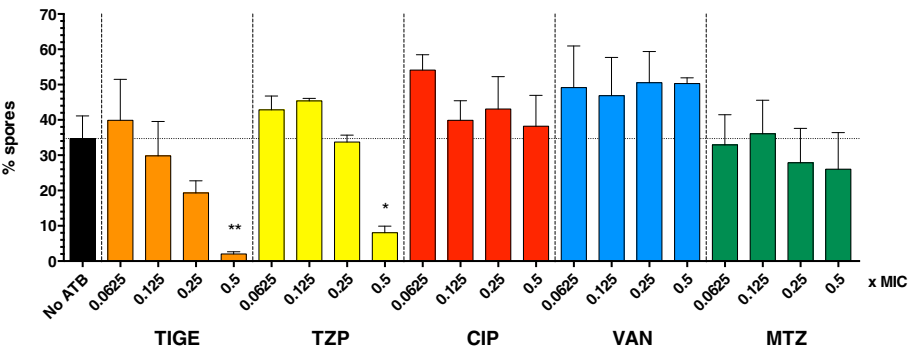

Supplement: MOESM3 [file 9446240]
